# Supplementary material
Source: PubMed Central journal article supplement (PMC3059195)
Supplement: NIHMS249613-supplement-1_si_001.pdf [file NIHMS249613-supplement-1_si_001.pdf]

Supporting information:

**Synthesis and Biological Evaluation of  
Apogossypolone Derivatives as Pan-active Inhibitors  
of Anti-apoptotic B-Cell Lymphoma/Leukemia-2  
(Bcl-2) Family Proteins**

**Jun Wei, Shinichi Kitada, John L. Stebbins, William Placzek, Dayong Zhai, Bainan Wu, Michele  
F. Rega, Ziming Zhang, Jason Cellitti, Li Yang, Russell Dahl, John C. Reed and Maurizio  
Pellecchia\***

*Sanford/Burnham Medical Research Institute, 10901 North Torrey Pines Road, La Jolla, California,  
92037;*

\*To whom correspondence should be addressed. Phone: (858) 6463159. Fax: (858) 7955225. E-mail:  
[mpellecchia@burnham.org](mailto:mpellecchia@burnham.org)

## **Contents:**

### **1. Experimental Section**

### **2. Supplementary Figures**

### **3. Supplementary Table**

### **4. Spectrums of key compounds (<sup>1</sup>HNMR, <sup>13</sup>CNMR and HPLC).**

## **1. Experimental Section.**

### **NMR Experiments.**

NMR-based binding assays have been conducted by acquiring one-dimensional <sup>1</sup>H experiments with 500 μL solution of Bcl-X<sub>L</sub> at 15 or 20 μM concentration, in absence and presence of added compounds, each at 150 or 200 μM concentration. By observing the aliphatic region of the spectra, binding could be readily detected due to chemical shift changes in active site methyl groups of Ile, Leu, Thr, Val or Ala (region between -0.8 and 0.3 ppm).<sup>1</sup> The binding mode has also been characterized by recording [<sup>15</sup>N, <sup>1</sup>H]-HSQC experiments with 500 μL solution of uniformly <sup>15</sup>N-labeled Bcl-X<sub>L</sub> (200 μM concentration) in absence and presence of added compounds, each at 200 μM concentration. <sup>15</sup>N and unlabeled Bcl-X<sub>L</sub> samples were prepared and purified as described previously.<sup>1</sup> All experiments were performed with a 600 MHz spectrometer Bruker Avance 600 equipped with four rf channels and z-axis pulse-field gradients.

### **Isothermal Titration Calorimetry Assays (ITC).**

Titration were performed using a VP-ITC or ITC200 calorimeter from Microcal (Northampton, MA). Bcl-X<sub>L</sub> was used at concentrations between 25 and 100 μM in 20 mM sodium phosphate buffer (pH 7.4) and 5-10% DMSO. Titrants were used at concentrations 10 to 15 fold that of the protein in the same buffer. Titrations were carried out at 25°C. Data were analyzed using Microcal Origin software provided by the ITC manufacturer (Microcal, Northampton, MA).

## ***In Vitro* ADME Studies.**

**Liver Microsomal Stability.** Pooled rat liver microsomes (BD Biosciences, # 452701) were preincubated with test compounds at 37.5 °C for 5 min in the absence of NADPH. The reaction was initiated by addition of NADPH and then incubated under the same conditions. The final incubation concentrations were 4 µM test compound, 2 mM NADPH, and 1 mg/mL (total protein) liver microsomes in phosphate-buffered saline (PBS) at pH 7.4. One aliquot (100 µL) of the incubation mixture was withdrawn at 0, 15, 30, and 60 min and combined immediately with 200 µL of ACN/MeOH containing an internal standard. After mixing, the sample was centrifuged at approximately 13,000 rpm for 12 min. The supernatant was transferred into an autosampler vial and the amount of test compound was quantified using the Shimadzu LCMS 2010EV mass spectrometer. The change of the AUC (area under the curve) of the parent compound as function of time was used as a measure of microsomal stability.

**Plasma Stability.** A 20 µL aliquot of a 10 mM solution in DMSO of the test compound was added to 2.0 mL of heparinized rat plasma (Lampire, P1-150N) to obtain a 100 µM final solution. The mixture was incubated for 1 h at 37.5 °C. Aliquots of 100 µL were taken (0, 30 min, 1 h) and diluted with 200 µL of MeOH containing internal standard. After mixing, the sample was centrifuged at approximately 13,000 rpm for 12 min. The supernatant was transferred into an autosampler vial and the amount of test compound was quantified using the Shimadzu LCMS-2010EV system. The change of the AUC (area under the curve) of the parent compound as function of time was used as a measure of microsomal stability.

**PAMPA (parallel artificial membrane permeation assay).** A 96-well microtiter plate (Millipore, # MSSACCEPTOR) was completely filled with aqueous buffer solution (pH 7.2) and covered with a microtiter filterplate (Millipore, # MAPBMN310). The hydrophobic filter material was impregnated with a 10% solution of hexadecane in hexane and the organic solvent was allowed to completely

evaporate. Permeation studies were started by the transfer of 200  $\mu$ L of a 100  $\mu$ M test compound solution on top of the filterplate. In general phosphate buffer at pH 7.2 buffer was used. The maximum DMSO content of the stock solutions was <5%. In parallel, an equilibrium solution lacking a membrane was prepared using the exact concentrations and specifications but lacking the membrane. The concentrations of the acceptor and equilibrium solutions were determined using the Shimadzu LCMS-2010EV and AUC methods. The permeation of a compound through the membrane layer is described by the percentage permeation (% flux). The flux values were calculated considering the concentration of the acceptor compartment after 8 h and that of a reference well with the same concentration containing no membrane barrier.

#### **NMR data for compounds (15b-i and 2b-2m)**

Following above mentioned procedure of compounds **15f** and **2f** and the appropriate starting materials and reagents used; compounds **15b-i** and **2b-2m** were synthesized. The syntheses of compounds **15b-c**, **2b-c**, **2e**, **2i** and **2l** have been previously described have been previously described.<sup>2,3</sup>

##### **5,5'-bis(2-cyclohexylethyl)-1,1',6,6',7,7'-hexamethoxy-3,3'-dimethyl-2,2'-binaphthyl (15d).**

Yield, 58%; <sup>1</sup>H NMR (600 MHz, CD<sub>3</sub>OD)  $\delta$  7.62 (s, 2H), 7.40 (s, 2H), 4.00 (s, 6H), 3.97 (s, 6H), 3.58 (s, 6H), 3.10 (t,  $J_1 = J_2 = 7.2$  Hz, 4H), 2.21 (s, 6H), 1.94 (d,  $J = 14.0$  Hz, 4H), 1.79-0.87 (m, 22H).

##### **1,1',6,6',7,7'-hexamethoxy-3,3'-dimethyl-5,5'-diphenethyl-2,2'-binaphthyl (15e).** Yield, 55%;

<sup>1</sup>H NMR (600 MHz, CDCl<sub>3</sub>)  $\delta$  7.65 (s, 2H), 7.45 (s, 2H), 7.36 (m, 4H), 4.00 (s, 6H), 3.94 (s, 6H), 3.58 (s, 6H), 3.40 (t,  $J_1 = 8.4$  Hz,  $J_2 = 7.8$  Hz, 4H), 3.02 (t,  $J_1 = 8.4$  Hz,  $J_2 = 7.8$  Hz, 4H), 2.21 (s, 6H).

##### **1,1',6,6',7,7'-hexamethoxy-3,3'-dimethyl-5,5'-bis(3-phenylpropyl)-2,2'-binaphthyl (15g).** Yield,

60%; <sup>1</sup>H NMR (600 MHz, CDCl<sub>3</sub>)  $\delta$  7.42 (s, 2H), 7.39 (s, 2H), 7.31 (m, 8H), 7.21 (m, 2H), 3.98 (s, 6H), 3.90 (s, 6H), 3.54 (s, 6H), 3.10 (t,  $J_1 = 7.2$  Hz,  $J_2 = 7.8$  Hz, 4H), 2.86 (t,  $J_1 = 7.2$  Hz,  $J_2 = 7.8$  Hz, 4H), 2.12 (s, 6H), 2.20 (m, 4H).

##### **1,1',6,6',7,7'-hexamethoxy-3,3'-dimethyl-5,5'-bis(3-methyl-3-phenylbutyl)-2,2'-binaphthyl (15h).**

Yield, 65%; <sup>1</sup>H NMR (600 MHz, CDCl<sub>3</sub>)  $\delta$  7.55 (d,  $J = 7.2$  Hz, 4H), 7.41 (t,  $J_1 = 7.2$  Hz,  $J_2 = 7.8$  Hz,

4H), 7.35 (s, 2H), 7.26 (m, 4H), 3.96 (s, 6H), 3.84 (s, 6H), 3.53 (s, 6H), 2.80 (m, 4H), 2.10 (s, 6H), 2.01 (t,  $J_1 = 7.2$  Hz,  $J_2 = 7.8$  Hz, 4H), 1.26 (s, 12H).

**5,5'-dibenzyl-1,1',6,6',7,7'-hexamethoxy-3,3'-dimethyl-2,2'-binaphthyl (15i).** Yield, 60%;  $^1\text{H}$  NMR (600 MHz,  $\text{CDCl}_3$ )  $\delta$  7.52 (s, 2H), 7.41 (s, 2H), 7.21 (m, 8H), 7.11 (m, 2H), 4.44 (s, 4H), 3.95 (s, 6H), 3.78 (s, 6H), 3.50 (s, 6H), 2.03 (s, 6H).

**5,5'-bis(4-chlorobenzyl)-1,1',6,6',7,7'-hexamethoxy-3,3'-dimethyl-2,2'-binaphthyl (15l).** Yield, 70%;  $^1\text{H}$  NMR (600 MHz,  $\text{CDCl}_3$ )  $\delta$  7.52 (s, 2H), 7.49 (s, 2H), 7.24 (m, 8H), 4.46 (s, 4H), 4.03 (s, 6H), 3.85 (s, 6H), 3.57 (s, 6H), 2.10 (s, 6H).

**5,5'-bis(biphenyl-4-ylmethyl)-1,1',6,6',7,7'-hexamethoxy-3,3'-dimethyl-2,2'-binaphthyl (15m).** Yield, 62%;  $^1\text{H}$  NMR (600 MHz,  $\text{CDCl}_3$ )  $\delta$  7.64 (s, 2H), 7.58 (d,  $J = 7.8$  Hz, 4H), 7.51 (m, 6H), 7.42 (t,  $J_1 = 7.2$  Hz,  $J_2 = 7.8$  Hz, 4H), 7.38 (d,  $J = 7.8$  Hz, 4H), 7.32 (m, 2H), 4.55 (s, 4H), 4.04 (s, 6H), 3.89 (s, 6H), 3.59 (s, 6H), 2.13 (s, 6H).

**5,5'-bis(2-cyclohexylethyl)-3,3'-dimethyl-2,2'-binaphthyl-1,1',6,6',7,7'-hexaol (2d).** Yield, 80%;  $^1\text{H}$  NMR (600 MHz,  $\text{CD}_3\text{OD}$ )  $\delta$  7.41 (s, 2H), 7.34 (s, 2H), 3.04 (dd,  $J_1 = 7.2$  Hz,  $J_2 = 13.8$  Hz, 4H), 2.05 (s, 6H), 1.93 (t,  $J_1 = J_2 = 13.2$  Hz, 4H), 1.76 (d,  $J = 12.0$  Hz, 4H), 1.69 (d,  $J = 12.6$  Hz, 2H), 1.55 (q,  $J_1 = J_2 = 6.6$  Hz, 4H), 1.34 (m, 8H), 1.04 (m, 4H).  $^{13}\text{C}$  NMR (600 MHz,  $\text{CD}_3\text{OD}$ )  $\delta$  148.94, 143.58, 143.38, 132.26, 128.69, 120.00, 118.27, 114.26, 113.42, 101.55, 37.68, 36.80, 32.84, 25.73, 21.89, 19.5. HPLC purity 98.0%,  $t_R = 15.28$  min (Method B). HRMS calcd for  $\text{C}_{38}\text{H}_{46}\text{O}_6$  599.3367 (M + H), found 599.3366.

**3,3'-dimethyl-5,5'-bis(3-phenylpropyl)-2,2'-binaphthyl-1,1',6,6',7,7'-hexaol (2g).** Yield, 85%;  $^1\text{H}$  NMR (600 MHz,  $\text{CD}_3\text{OD}$ )  $\delta$  7.31 (s, 2H), 7.28 (m, 6H), 7.18 (t,  $J_1 = J_2 = 6.6$  Hz, 2H), 7.14 (s, 2H), 3.07 (m, 4H), 2.81 (dd,  $J_1 = 7.2$  Hz,  $J_2 = 7.8$  Hz, 4H), 2.01 (m, 4H), 1.97 (s, 6H).  $^{13}\text{C}$  NMR (600 MHz,  $\text{CD}_3\text{OD}$ )  $\delta$  149.28, 143.96, 142.54, 132.74, 129.07, 128.18, 127.84, 125.24, 119.71, 118.63, 114.59, 113.85, 102.13, 35.68, 31.18, 24.31. HPLC purity 98.6%,  $t_R = 12.36$  min (Method B). HRMS calcd for  $\text{C}_{40}\text{H}_{38}\text{O}_6$  615.2741 (M + H), found 615.2765.

**3,3'-dimethyl-5,5'-bis(3-methyl-3-phenylbutyl)-2,2'-binaphthyl-1,1',6,6',7,7'-hexaol (2h).** Yield, 80%;  $^1\text{H}$  NMR (600 MHz,  $\text{CD}_3\text{OD}$ )  $\delta$  7.55 (d,  $J = 7.2$  Hz, 4H), 7.40 (m, 6H), 7.23 (t,  $J_1 = J_2 = 7.2$  Hz, 2H), 6.87 (s, 2H), 2.75 (dd,  $J_1 = 4.2$  Hz,  $J_2 = 10.8$  Hz, 4H), 1.96 (m, 4H), 1.95 (s, 6H), 1.48 (s, 6H), 1.47 (s, 6H).  $^{13}\text{C}$  NMR (600 MHz,  $\text{CD}_3\text{OD}$ )  $\delta$  149.21, 148.95, 143.93, 143.72, 132.61, 128.94, 127.75, 125.82, 125.17, 120.13, 118.57, 114.46, 113.74, 101.92, 43.67, 37.66, 27.96, 20.43. HPLC purity 98.0%,  $t_{\text{R}} = 16.08$  min (Method B). HRMS calcd for  $\text{C}_{44}\text{H}_{46}\text{O}_6$  671.3367 (M + H), found 671.3367.

**5,5'-bis(4-chlorobenzyl)-3,3'-dimethyl-2,2'-binaphthyl-1,1',6,6',7,7'-hexaol (2l).** Yield, 80%;  $^1\text{H}$  NMR (600 MHz,  $\text{CD}_3\text{OD}$ )  $\delta$  7.48 (s, 2H), 7.28 (m, 6H), 7.18 (d,  $J = 7.8$  Hz, 4H), 4.44 (d,  $J = 15$  Hz, 2H), 4.33 (d,  $J = 15.6$  Hz, 2H), 1.94 (s, 6H). HPLC purity 99.3%,  $t_{\text{R}} = 14.95$  min (Method A). HRMS calcd for  $\text{C}_{40}\text{H}_{28}\text{Cl}_2\text{O}_6$  627.1336 (M + H), found 627.1340.

## 2. Supplementary Figures

### Supplementary Fig. 1.

NMR binding studies. (A) Structures of compounds **9** and **10**. (B) Aliphatic region of the  $^1\text{H}$ -NMR spectrum of Bcl-X<sub>L</sub> (20  $\mu\text{M}$ , black) and Bcl-X<sub>L</sub> in the presence of compound **6a** (200  $\mu\text{M}$ , purple), compound **6i** (200  $\mu\text{M}$ , blue) and compound **6f** (200  $\mu\text{M}$ , red). (C) Superposition of [ $^{15}\text{N}$ ,  $^1\text{H}$ ]-TROSY spectra of free Bcl-X<sub>L</sub> (200  $\mu\text{M}$ , red) after addition of compound **6f** (green, 200  $\mu\text{M}$ ) (D) Superposition of [ $^{15}\text{N}$ ,  $^1\text{H}$ ]-TROSY spectra of free Bcl-X<sub>L</sub> (200  $\mu\text{M}$ , red) after addition of compound **8a** (blue, 200  $\mu\text{M}$ ).

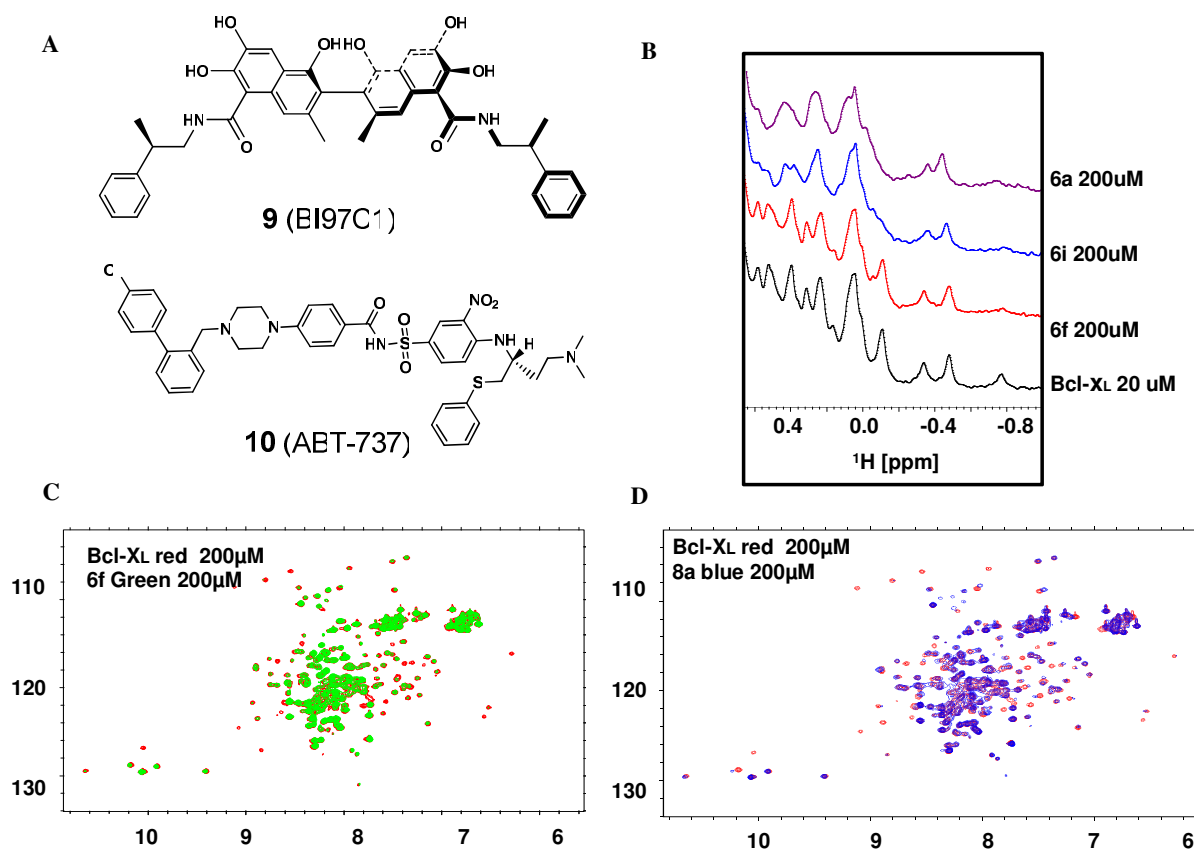

### Supplementary Figure 2:

(A) Fluorescence polarization-based competitive binding curves of **6a** (red square), **6i** (blue down triangle) and **6b** (dark dot) using Bcl-X<sub>L</sub>. (B) Fluorescence polarization-based competitive binding curves of **6i** using Bcl-X<sub>L</sub> (red square), Bcl-2 (green dot), Bfl-1 (blue up triangle) and Mcl-1 (dark down triangle). (C) Cytotoxicity assays of **6i** against BP3 and RS4;11 using Annexin V-FITC and propidium iodide assay. (D) Inhibition of cell growth by **6a** and its derivatives in the BP3 cell line. Cells were treated for 1 days and cell viability was evaluated using Annexin V-FITC and propidium iodide assay.

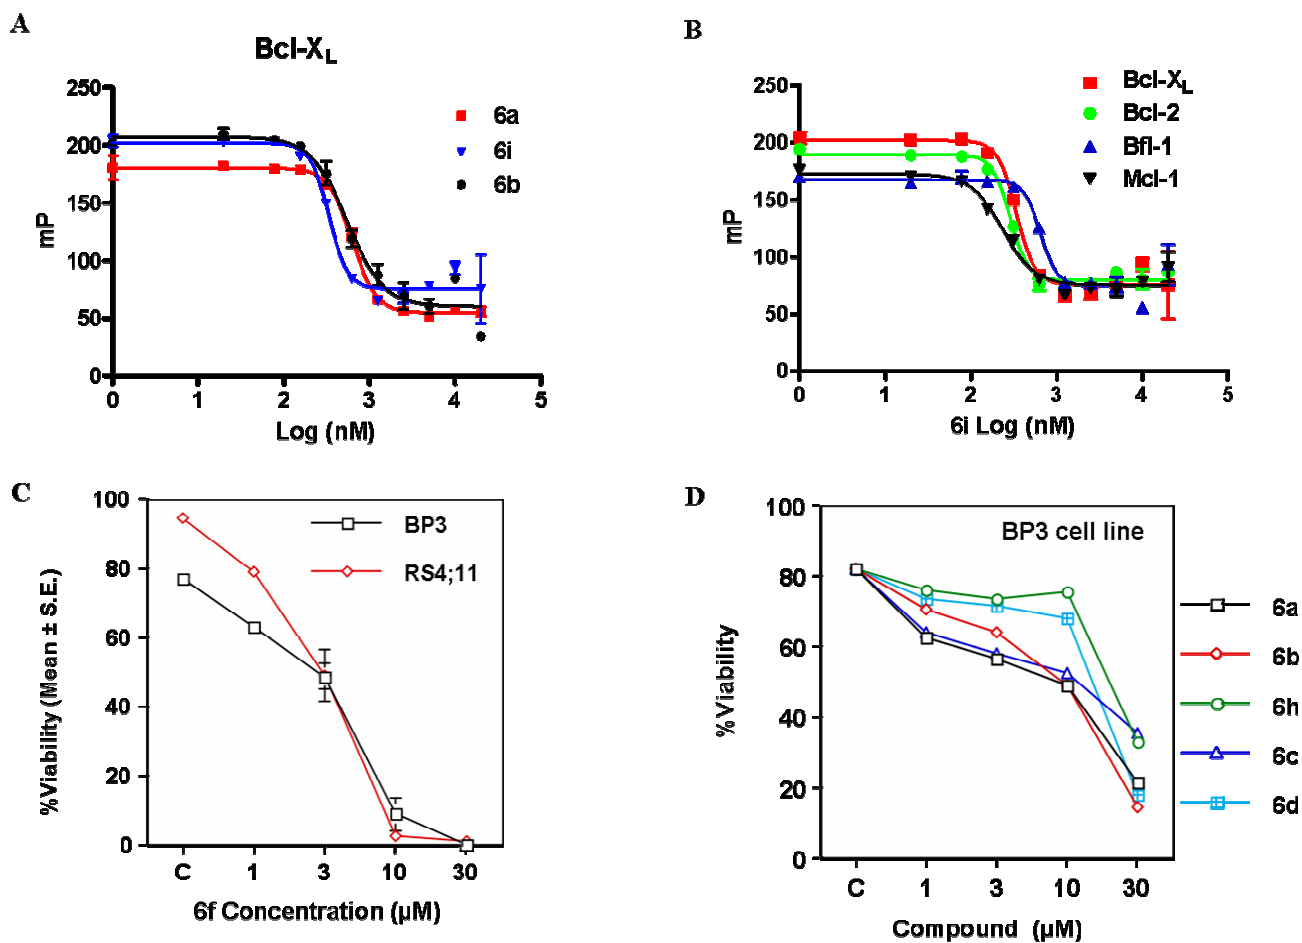

Supplementary Figure 3.

(A) Cytotoxicity assays of **6a**, **6b**, **6c** against primary CLL using Annexin V-FITC and propidium iodide assay. (B) Cytotoxicity assays of **6a**, **6f**, **6i** against primary CLL using Annexin V-FITC and propidium iodide assay..

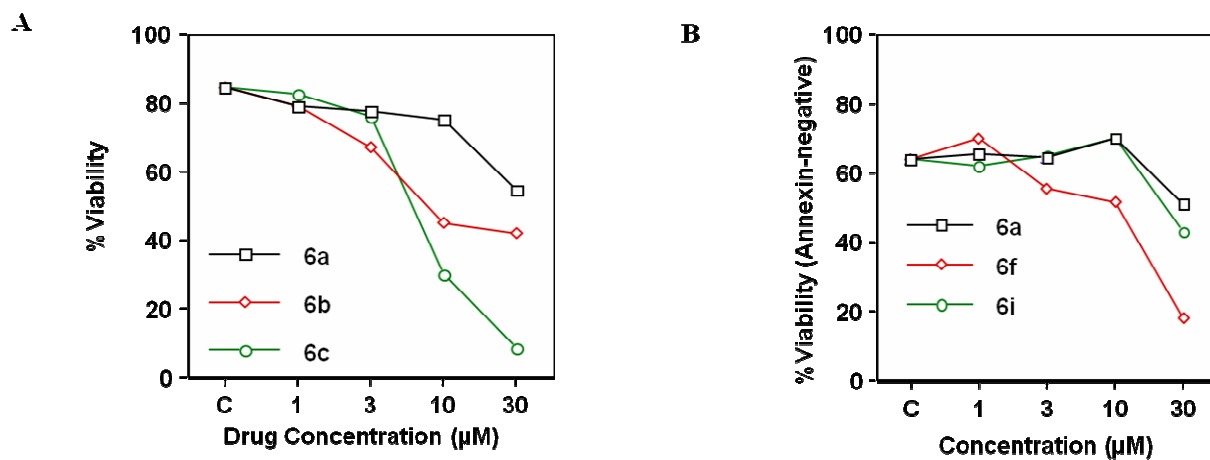

### 3. Supplementary Table

Supplementary Table 1. Summary of cytotoxicity assay of **6f** against primary CLL cells using Annexin V-FITC and propidium iodide assay.

|         | CLL Pt#1     | CLL Pt#2     | CLL Pt#3    | CLL Pt#4      | CLL Pt#5     | CLL Pt#6     | CLL Pt#7    |
|---------|--------------|--------------|-------------|---------------|--------------|--------------|-------------|
| CRC ID# | TJK263       | TJK287       | TJK484      | TJK688        | TJK896       | TJK898       | TJK578      |
| IC50    | 5.56 $\mu$ M | 7.98 $\mu$ M | 2.2 $\mu$ M | 12.44 $\mu$ M | 9.13 $\mu$ M | 16.9 $\mu$ M | 1.0 $\mu$ M |

Supplementary Table 2. Summary of  $K_i$  values of selected 5, 5' 6a derivatives in our FP assay.

| Compound | $K_i$ ( $\mu$ M) FPA |       |       |       |
|----------|----------------------|-------|-------|-------|
|          | Bcl-X <sub>L</sub>   | Bcl-2 | Bfl-1 | Mcl-1 |
| 6a       | 0.42                 | 0.25  | 1.47  | 0.43  |
| 6b       | 0.37                 | 0.17  | 0.93  | 0.31  |
| 6f       | 2.07                 | 2.08  | 9.33  | 1.37  |
| 6i       | 0.23                 | 0.19  | 0.43  | 0.16  |
| 6c       | 2.0                  | 1.53  | ND    | 2.07  |
| 6d       | 8.4                  | 4.47  | ND    | 3.93  |
| 6e       | 1.2                  | 1.73  | 6.47  | 0.87  |
| 6g       | 0.96                 | 1.45  | 3.53  | 0.45  |
| 6l       | 0.11                 | 0.23  | 0.47  | 0.27  |
| 7        | 0.24                 | 0.15  | 0.46  | 0.23  |
| 8a       | 0.21                 | 0.15  | 0.47  | 0.31  |
| 8c       | 0.16                 | 0.14  | 0.87  | 0.21  |

ND<sup>a\*</sup> = Not determined

#### **4. Spectrums of key compounds ( $^1\text{H}$ NMR, $^{13}\text{C}$ NMR and HPLC).**

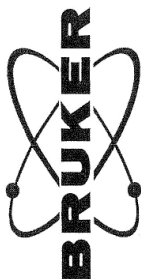

Current Data Parameters  
NAME jun\_synthesis  
EXPNO 825  
PROCNO 1

F2 - Acquisition Parameters  
Date\_ 20090715  
Time 9.38  
INSTRUM spect  
PROBHD 5 mm TXI 1H/D-  
PULPROG zg  
TD 16384  
SOLVENT MeOD  
NS 16  
DS 4  
SWH 13227.514 Hz  
FIDRES 0.807343 Hz  
AQ 0.6193652 sec  
RG 128  
DW 37.800 usec  
DE 6.50 usec  
TE 300.2 K  
D1 2.00000000 sec  
TD0 1

===== CHANNEL f1 =====  
NUC1 1H  
P1 7.00 usec  
PL1 -2.00 dB  
SFO1 600.1328210 MHz

F2 - Processing parameters  
SI 32768  
SF 600.1300169 MHz  
WDW EM  
SSB 0  
LB 1.00 Hz  
GB 0  
PC 1.00

3.464  
3.450  
3.305  
2.797  
2.784  
2.770  
2.301  
1.930

7.404  
7.232  
7.220  
7.095  
7.082

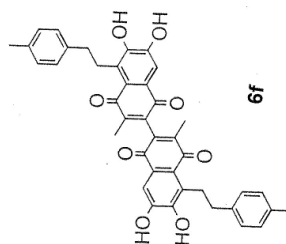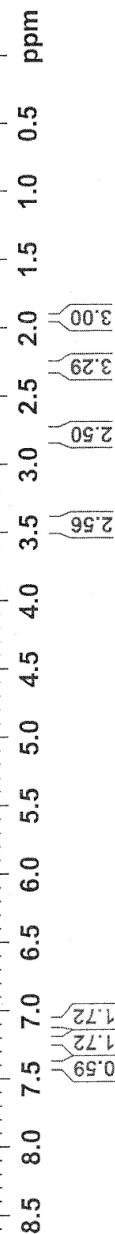

BI97D1

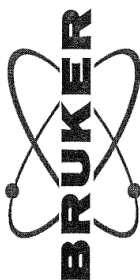

Current Data Parameters  
 NAME jun\_synthesis  
 EXPNO 852  
 PROCNO 1

F2 - Acquisition Parameters  
 Date\_ 20090917  
 Time 18.19  
 INSTRUM spect  
 PROBHD 5 mm TXI 1H/D-  
 PULPROG zg  
 TD 16384  
 SOLVENT MeOD  
 NS 8  
 DS 4  
 SWH 8389.262 Hz  
 FIDRES 0.512040 Hz  
 AQ 0.9765364 sec  
 RG 8  
 DW 59.600 usec  
 DE 6.50 usec  
 TE 264.4 K  
 D1 4.00000000 sec  
 TD0 1

===== CHANNEL f1 =====  
 NUC1 1H  
 P1 5.50 usec  
 PL1 0.00 dB  
 SFO1 600.1328210 MHz

F2 - Processing parameters  
 SI 32768  
 SF 600.1300488 MHz  
 EM 0  
 WDW 0  
 SSB 1.00 Hz  
 LB 0  
 GB 0  
 PC 1.00

BI79D6 for xenograft

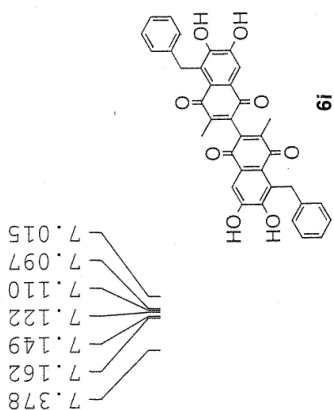

4.803  
4.581  
4.561

3.241

1.797

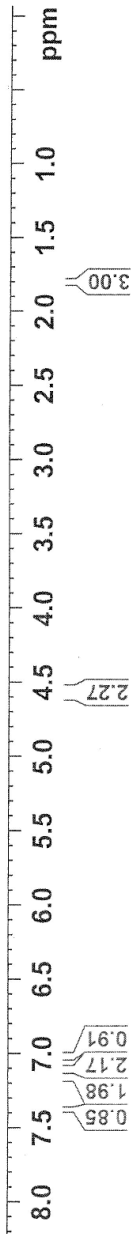

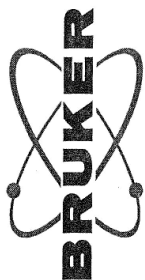

NAME zz\_33\_Jun  
 EXPNO 2  
 PROCNO 1  
 Date\_ 20091016  
 Time 11.21  
 INSTRUM spect  
 PROBHD 5 mm CPTCI 1H-  
 PULPROG zgpg30  
 TD 8192  
 SOLVENT MeOD  
 NS 2048  
 DS 8  
 SWH 36231.883 Hz  
 FIDRES 4.422837 Hz  
 AQ 0.1130996 sec  
 RG 1820  
 DW 13.800 usec  
 DE 6.50 usec  
 TE 299.9 K  
 D1 2.00000000 sec  
 D11 0.03000000 sec  
 TDO 1

===== CHANNEL f1 =====  
 NUC1 13C  
 P1 33.00 usec  
 PL1 0.00 dB  
 PL1W 78.37085724 W  
 SF01 150.9209173 MHz

===== CHANNEL f2 =====  
 CPDPRG2 waltz16  
 NUC2 1H  
 PCPD2 200.00 usec  
 PL2 120.00 dB  
 PL12 30.00 dB  
 PL13 120.00 dB  
 PL2W 0.00000000 W  
 PL12W 0.01469454 W  
 PL13W 0.00000000 W  
 SFO2 600.1330006 MHz  
 SI 16384  
 SF 150.9028173 MHz  
 WDW EM  
 SSB 0  
 LB 5.00 Hz  
 GB 0  
 PC 1.40

48.10  
 47.97  
 47.89  
 47.83  
 47.75  
 47.68  
 47.61  
 47.54  
 47.47  
 47.40  
 47.33  
 47.26  
 47.20  
 47.12  
 34.44  
 28.68  
 19.69

149.35  
 148.72  
 146.61  
 139.47  
 138.20  
 134.62  
 131.79  
 128.32  
 128.14  
 126.47  
 123.95  
 110.50

185.65  
 182.87

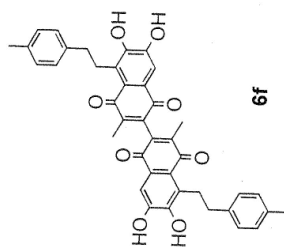

D1

in MeOD.

ppm

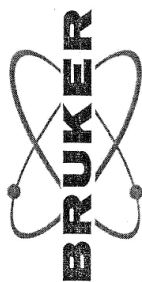

```

NAME
EXPNO      12
PROCNO     1
Date_      20090818
Time       13.52
INSTRUM    spect
PROBHD     5 mm CPTCI 1H-
PULPROG    zgpg30
TD          8192
SOLVENT     DMSO
NS          2048
DS          8
SWH         33333.332 Hz
FIDRES     4.069010 Hz
AQ          0.1229300 sec
RG          1820
DE          15.000 usec
DW          6.50 usec
TE          300.0 K
D1          2.00000000 sec
D11         0.03000000 sec
TD0         1

===== CHANNEL f1 =====
NUC1        13C
P1          33.00 usec
PL1         0.00 dB
PL11        78.37085724 W
SF01        150.9194083 MHz

===== CHANNEL f2 =====
CPDPRG2    walt16
NUC2        1H
PCPD2       200.00 usec
PL2         120.00 dB
PL12        30.00 dB
PL13        120.00 dB
PL23        0.00000000 W
PL12W       0.01469454 W
PL13W       0.00000000 W
SF02        600.1330006 MHz
SI          16384
SF          150.9028173 MHz
WDW         EM
SSB         0
LB          5.00 Hz
GB          0
PC          1.40

```

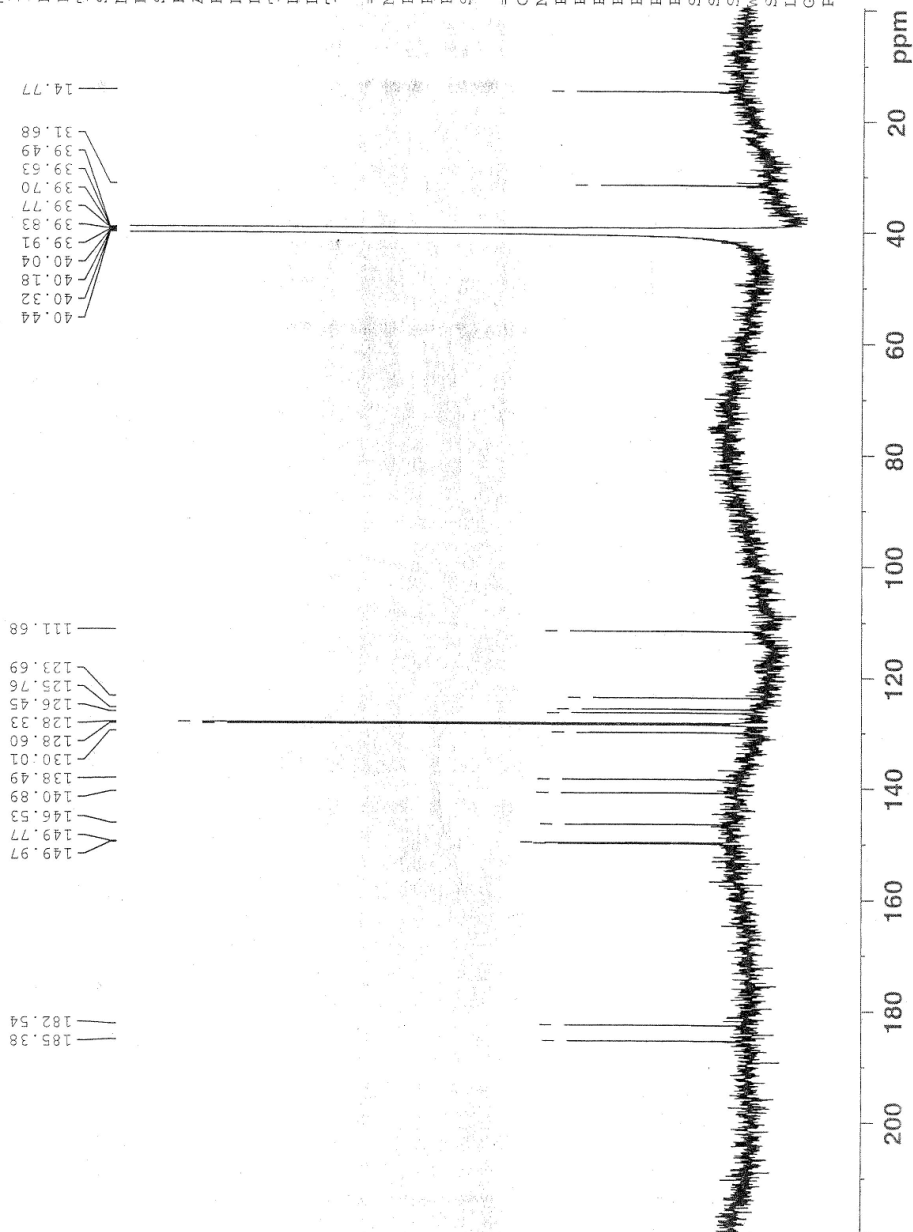

burnham

Project Name: J20090707

Reported by User: System

Breeze

## SAMPLE INFORMATION

Sample Name: bi97d1 pure  
Sample Type: Unknown  
Vial: 35  
Injection #: 1  
Injection Volume: 10.00  $\mu$ l  
Run Time: 20.00 Minutes

Acquired By: System  
Date Acquired: 10/14/2009 10:55:18 PM  
Acq. Method: Burnham 50\_95%B 280  
Date Processed: 10/14/2009 11:16:31 PM  
Channel Name: 2487Channel 1  
Sample Set Name: m

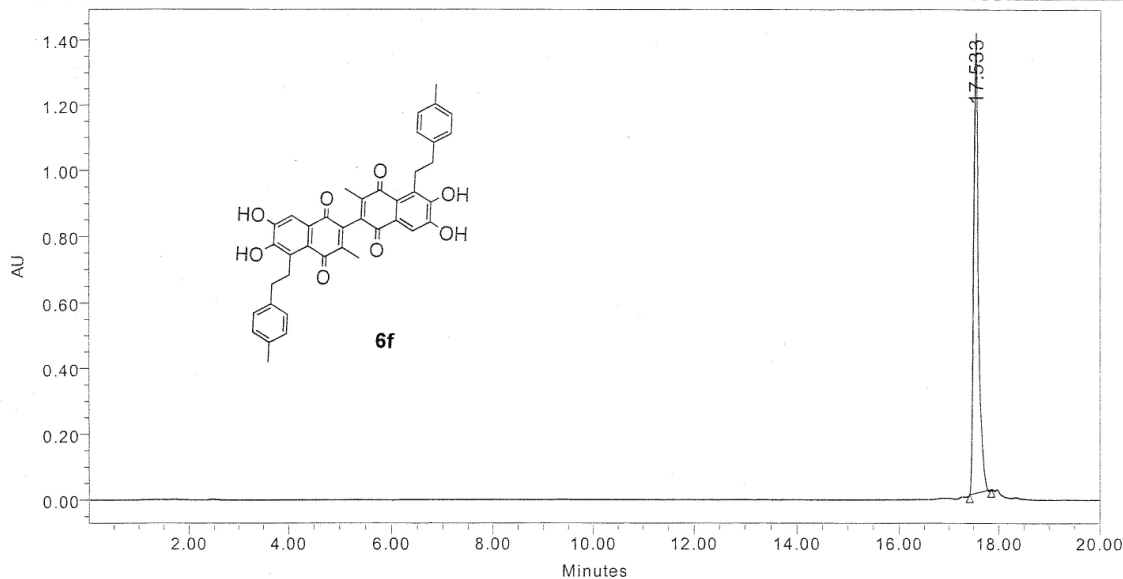

|   | RT<br>(min) | Area<br>( $\mu$ V*sec) | % Area | Height<br>( $\mu$ V) | %<br>Height |
|---|-------------|------------------------|--------|----------------------|-------------|
| 1 | 17.533      | 9344323                | 100.00 | 1390811              | 100.00      |

burnham

Project Name: J20090707

Reported by User: System

Breeze

## SAMPLE INFORMATION

Sample Name: NEW BI97D6  
Sample Type: Unknown  
Vial: 5  
Injection #: 1  
Injection Volume: 10.00 ul  
Run Time: 20.00 Minutes

Acquired By: System  
Date Acquired: 8/18/2009 5:41:43 PM  
Acq. Method: Burnham 50\_95%B 280  
Date Processed: 8/18/2009 6:54:16 PM  
Channel Name: 2487Channel 2  
Sample Set Name M

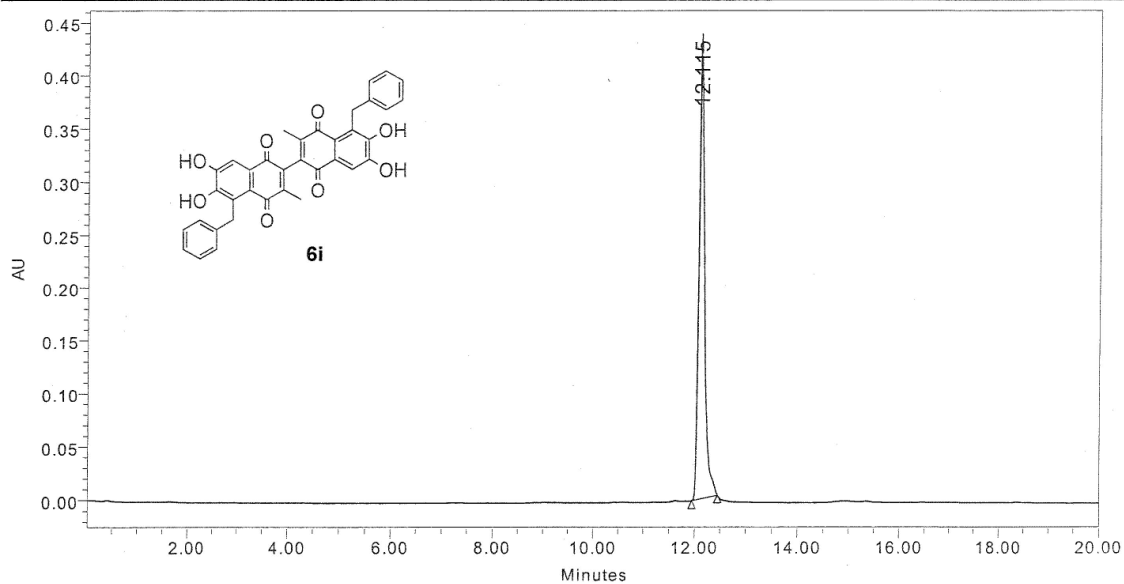

|   | RT<br>(min) | Area<br>( $\mu V \cdot \text{sec}$ ) | % Area | Height<br>( $\mu V$ ) | %<br>Height |
|---|-------------|--------------------------------------|--------|-----------------------|-------------|
| 1 | 12.115      | 3331250                              | 100.00 | 436490                | 100.00      |

## References:

1. Rega, M. F.; Leone, M.; Jung, D.; Cotton, N. J.; Stebbins, J. L.; Pellecchia, M. Structure-based discovery of a new class of Bcl-xL antagonists. *Bioorg Chem* 2007, 35, 344-53.
2. Wei, J.; Kitada, S.; Rega, M. F.; Emdadi, A.; Yuan, H.; Cellitti, J.; Stebbins, J. L.; Zhai, D.; Sun, J.; Yang, L.; Dahl, R.; Zhang, Z.; Wu, B.; Wang, S.; Reed, T. A.; Lawrence, N.; Sebt, S.; Reed, J. C.; Pellecchia, M. Apogossypol derivatives as antagonists of antiapoptotic Bcl-2 family proteins. *Mol Cancer Ther* 2009, 8, 904-13.
3. Wei, J.; Kitada, S.; Rega, M. F.; Stebbins, J. L.; Zhai, D.; Cellitti, J.; Yuan, H.; Emdadi, A.; Dahl, R.; Zhang, Z.; Yang, L.; Reed, J. C.; Pellecchia, M. Apogossypol derivatives as pan-active inhibitors of antiapoptotic B-cell lymphoma/leukemia-2 (Bcl-2) family proteins. *Journal of medicinal chemistry* 2009, 52, 4511-23.
